# Supplementary material for: Theoretical investigation of a C2N monolayer as a bifunctional electrocatalyst for rechargeable non-aqueous Li–air batteries
Source: Royal Society of Chemistry journal article supplement (doi:10.1039/d4ta07789j), 2025-01-01
Supplement: d4ta07789j1.pdf [file d4ta07789j1.pdf]

**Supporting Information**

**Theoretical investigation of a C<sub>2</sub>N Monolayer as  
Bifunctional Electrocatalyst for Rechargeable  
Non-aqueous Li-Air Batteries**

Priya Das,<sup>†</sup> Atish Ghosh,<sup>†</sup> Biplab Goswami,<sup>‡</sup> and Pranab Sarkar<sup>\*,†</sup>

<sup>†</sup>*Department of Chemistry, Visva-Bharati University, Santiniketan 731235, India*

<sup>‡</sup>*Department of Physics, Sreegopal Banerjee College, Bagati, Hoogly-712148, India*

E-mail: pranab.sarkar@visva-bharati.ac.in

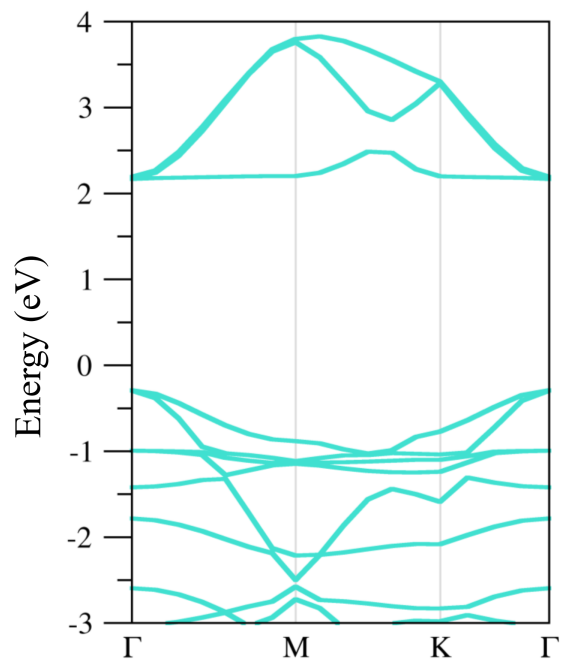

Figure S1: The Electronic band structure of  $C_2N$  monolayer using HSE06 functional. The Fermi level is set to zero.

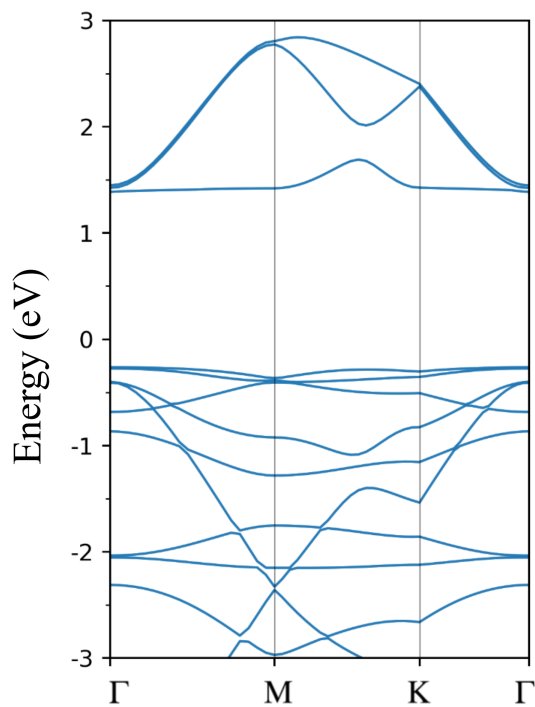

Figure S2: The Electronic band structure of  $C_2N$  monolayer using spin-orbit coupling, respectively. The Fermi level is set to zero.

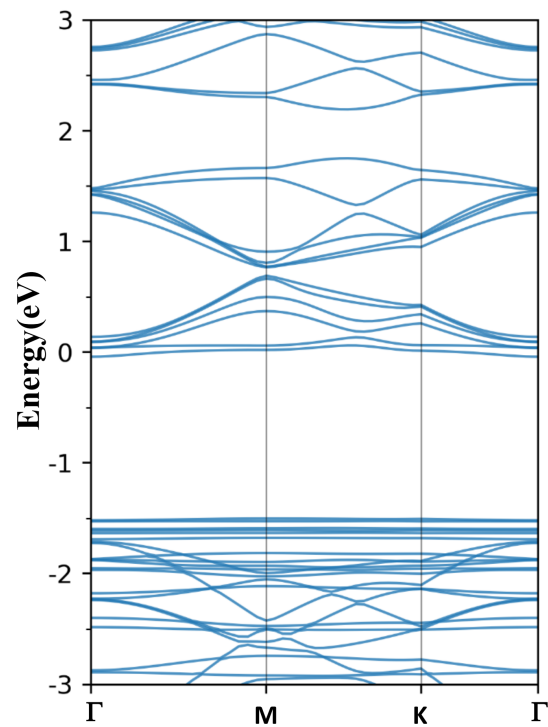

Figure S3: The Electronic band structure of C<sub>2</sub>N monolayer after the adsorption of Li atom. The Fermi level is set to zero.

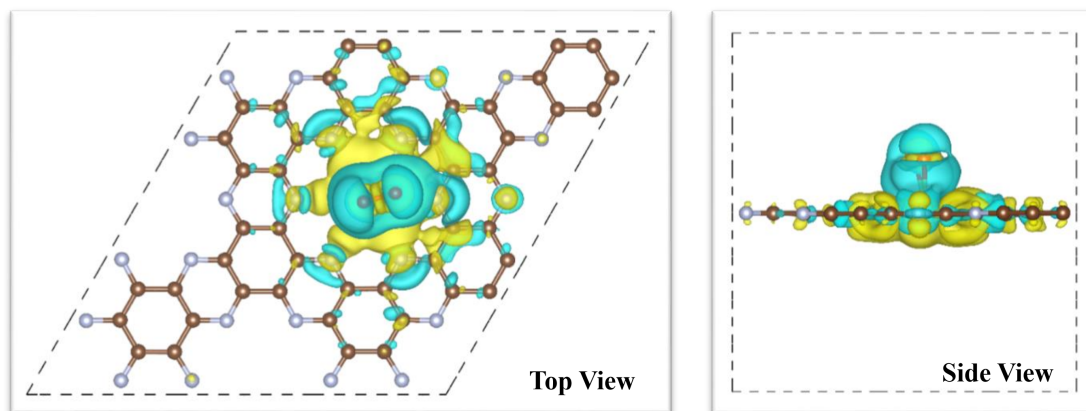

Figure S4: Charge density difference plot of LiO<sub>2</sub> adsorbed C<sub>2</sub>N monolayer.

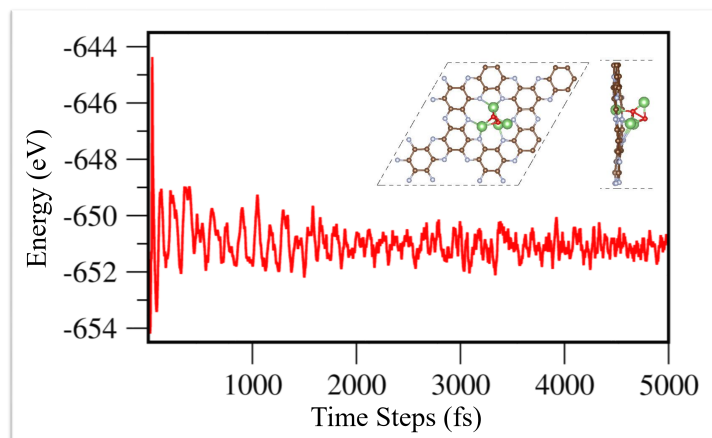

Figure S5: Total potential energy fluctuation during AIMD simulation at 300K of  $\text{Li}_4\text{O}_2$  adsorbed  $\text{C}_2\text{N}$  monolayer.

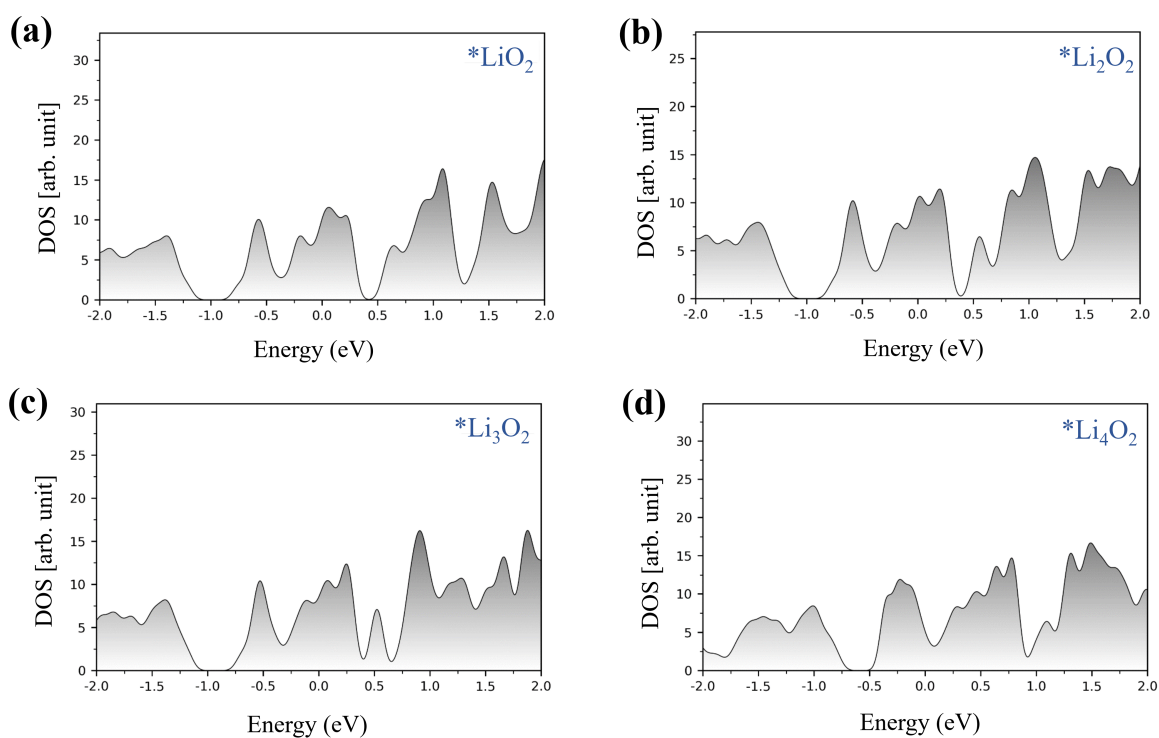

Figure S6: Density of states (DOS) of  $\text{LiO}_2$ ,  $\text{Li}_2\text{O}_2$ ,  $\text{Li}_3\text{O}_2$  and  $\text{Li}_4\text{O}_2$  adsorbed  $\text{C}_2\text{N}$  monolayer, respectively. The Fermi level is set to zero.

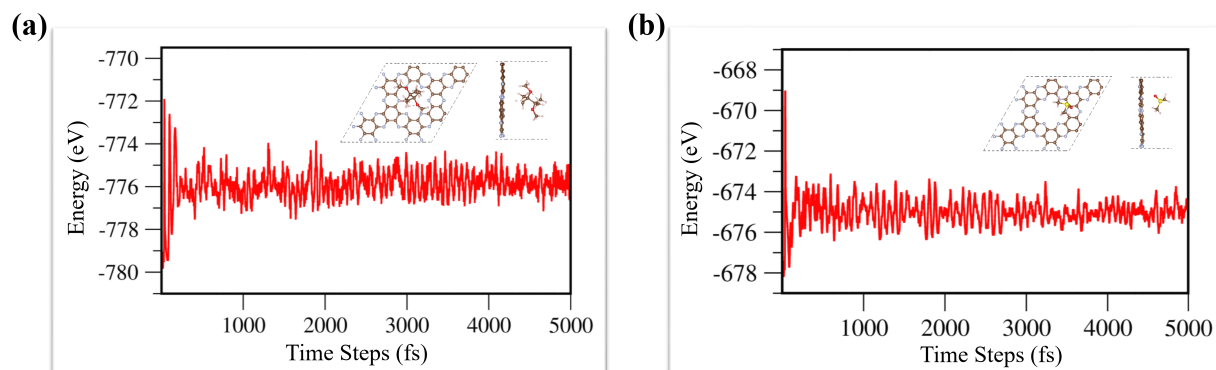

Figure S7: Total potential energy fluctuation during AIMD simulation at 300K of (a) DMDMB and (b) DMSO adsorbed C<sub>2</sub>N monolayer.

Table S1: The Calculated Energy, zero point energy (ZPE), -TS, and Gibbs free energy (G) of a single lithium atom, oxygen molecule, C<sub>2</sub>N monolayer and \*Li<sub>x</sub>O<sub>2y</sub> species.

| System                                            | Energy (eV) | ZPE (eV) | -TS (eV) | G (eV)  |
|---------------------------------------------------|-------------|----------|----------|---------|
| Li                                                | -2.00       | 0.03     | -0.37    | -2.34   |
| O <sub>2</sub>                                    | -8.77       | 0.10     | -0.68    | -9.35   |
| C <sub>2</sub> N                                  | -627.82     | 11.14    | -2.17    | -618.85 |
| C <sub>2</sub> N – LiO <sub>2</sub>               | -642.20     | 11.27    | -2.26    | -633.19 |
| C <sub>2</sub> N – Li <sub>2</sub> O <sub>2</sub> | -646.53     | 11.33    | -2.35    | 637.55  |
| C <sub>2</sub> N – Li <sub>3</sub> O <sub>2</sub> | -650.70     | 11.38    | -2.34    | -641.66 |
| C <sub>2</sub> N – Li <sub>4</sub> O <sub>2</sub> | -654.64     | 11.40    | -2.41    | -645.65 |
| C <sub>2</sub> N – Li <sub>2</sub> O <sub>4</sub> | -656.95     | -        | -        | -       |
| C <sub>2</sub> N – Li <sub>3</sub> O <sub>4</sub> | -660.60     | -        | -        | -       |
| C <sub>2</sub> N – Li <sub>4</sub> O <sub>4</sub> | -665.03     | -        | -        | -       |

## Reaction free energy

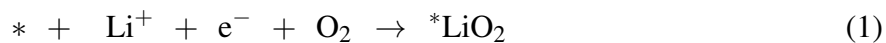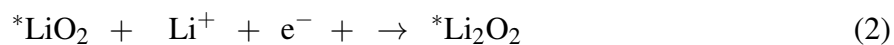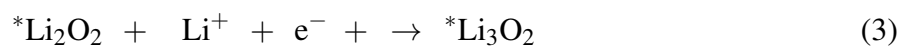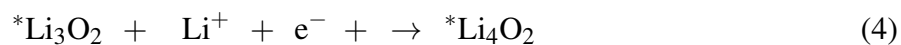

$$\Delta G_1 = G_{*LiO_2} - G^* - G_{Li} - G_{O_2} \quad (5)$$

$$\Delta G_2 = G_{*Li_2O_2} - G^*_{Li_2O_2} - G_{Li} \quad (6)$$

$$\Delta G_3 = G^*_{Li_3O_2} - G^*_{Li_2O_2} - G_{Li} \quad (7)$$

$$\Delta G_4 = G^*_{Li_4O_2} - G^*_{Li_3O_2} - G_{Li} \quad (8)$$

Optimized Structures (VASP format):

C2N

1.0000000000000000

16.6399993895999998 0.0000000000000000 0.0000000000000000

8.3199996947999999 14.4106621904000001 0.0000000000000000

0.0000000000000000 0.0000000000000000 15.0000000000000000

C N

48 24

Direct

0.2871320320000024 0.3723663359999989 0.4981306709999984

0.2871319959999994 0.8723663520000002 0.4981306709999984

0.7871320610000012 0.3723663359999989 0.4981306709999984

0.7871320530000006 0.8723663520000002 0.4981306709999984

0.3729613940000007 0.2865329729999999 0.4981406850000027

0.3729613530000009 0.7865330560000032 0.4981406850000027

0.8729614519999984 0.2865329729999999 0.4981406850000027

0.8729614100000020 0.7865330560000032 0.4981406850000027

0.4611440740000035 0.3723607769999973 0.4982929869999992

0.4611440660000028 0.8723607929999986 0.4982929869999992

0.9611440740000035 0.3723607769999973 0.4982929869999992  
0.9611440660000028 0.8723607929999986 0.4982929869999992  
0.3729669129999991 0.4605414859999968 0.4983169559999965  
0.3729669049999984 0.9605415019999981 0.4983169559999965  
0.8729669129999991 0.4605414859999968 0.4983169559999965  
0.8729669049999984 0.9605415019999981 0.4983169559999965  
0.1196921700000004 0.2072688410000012 0.4982788720000002  
0.1196921929999988 0.7072688240000033 0.4982788720000002  
0.6196922130000004 0.2072688410000012 0.4982788720000002  
0.6196921639999999 0.7072688240000033 0.4982788720000002  
0.1196917959999979 0.2930932029999980 0.4982180599999992  
0.1196917429999971 0.7930932519999985 0.4982180599999992  
0.6196918249999968 0.2930932029999980 0.4982180599999992  
0.6196917429999971 0.7930932519999985 0.4982180599999992  
0.2078740370000034 0.2931006479999994 0.4981164300000032  
0.2078740620000019 0.7931005980000023 0.4981164300000032  
0.7078740370000034 0.2931006479999994 0.4981164300000032  
0.7078740620000019 0.7931005980000023 0.4981164300000032  
0.2937065039999993 0.2072660620000022 0.4981562930000010  
0.2937064799999973 0.7072661110000027 0.4981562930000010  
0.7937065610000005 0.2072660620000022 0.4981562930000010  
0.7937065369999985 0.7072661110000027 0.4981562930000010  
0.2937060140000014 0.1190897039999967 0.4982827500000013  
0.2937060100000011 0.6190897689999986 0.4982827500000013  
0.7937061000000014 0.1190897039999967 0.4982827500000013  
0.7937060670000022 0.6190897689999986 0.4982827500000013  
0.2078774009999975 0.1190891580000013 0.4983219149999982

0.2078773929999969 0.6190891740000026 0.4983219149999982  
0.7078774009999975 0.1190891580000013 0.4983219149999982  
0.7078773929999969 0.6190891740000026 0.4983219149999982  
0.2871404730000009 0.4605408910000008 0.4982469879999982  
0.2871404650000002 0.9605409070000022 0.4982469879999982  
0.7871405309999986 0.4605408910000008 0.4982469879999982  
0.7871405229999979 0.9605409070000022 0.4982469879999982  
0.4611420499999994 0.2865373409999989 0.4982098899999983  
0.4611420749999979 0.7865372910000019 0.4982098899999983  
0.9611420499999994 0.2865373409999989 0.4982098899999983  
0.9611420749999979 0.7865372910000019 0.4982098899999983  
0.0404112459999979 0.3744569440000021 0.4982452069999965  
0.0404112209999994 0.8744569930000026 0.4982452069999965  
0.5404111889999967 0.3744569440000021 0.4982452069999965  
0.5404111639999982 0.8744569930000026 0.4982452069999965  
0.0404232300000018 0.2051646339999991 0.4982031190000029  
0.0404232240000013 0.7051646159999976 0.4982031190000029  
0.5404232149999970 0.2051646339999991 0.4982031190000029  
0.5404232240000013 0.7051646159999976 0.4982031190000029  
0.2057710779999979 0.0398269279999965 0.4982753439999996  
0.2057710619999966 0.5398269610000028 0.4982753439999996  
0.7057711069999968 0.0398269279999965 0.4982753439999996  
0.7057711479999966 0.5398269610000028 0.4982753439999996  
0.3750651650000023 0.0398051270000011 0.4983082769999996  
0.3750651679999990 0.5398051219999971 0.4983082769999996  
0.8750652230000000 0.0398051270000011 0.4983082769999996  
0.8750652250000002 0.5398051219999971 0.4983082769999996



0.3750803300000030 0.2051629629999994 0.4981257119999967  
0.3750803020000006 0.7051629620000028 0.4981257119999967  
0.8750803020000006 0.2051629629999994 0.4981257119999967  
0.8750803020000006 0.7051629620000028 0.4981257119999967  
0.2057539349999971 0.3744712720000010 0.4980698589999975  
0.2057539560000023 0.8744712880000023 0.4980698589999975  
0.7057539059999982 0.3744712720000010 0.4980698589999975  
0.7057539560000023 0.8744712880000023 0.4980698589999975

### C2N-Li

1.0000000000000000  
16.6399993895999998 0.0000000000000000 0.0000000000000000  
8.3199996947999999 14.4106621904000001 0.0000000000000000  
0.0000000000000000 0.0000000000000000 15.0000000000000000

### C N Li

48 24 1

### Direct

0.2866809826265768 0.3722649834842800 0.4981982467698157  
0.2870541118560805 0.8719230043866273 0.4982332532509411  
0.7871070432861634 0.3729493119828731 0.4982392526196545  
0.7864919664730622 0.8727707133597673 0.4981856552828125  
0.3725916207065233 0.2865667000184304 0.4981886068824934  
0.3730192252711451 0.7860198795619474 0.4982420650810019  
0.8724800551757975 0.2867872548084005 0.4982444639036397  
0.8724045776102529 0.7867905249279321 0.4981857140813467  
0.4603583559999302 0.3727910662104657 0.4982566986097622  
0.4607983053671202 0.8714792485414301 0.4982583897489755

0.9606856882077107 0.3723414683815204 0.4982388589612620  
0.9606398356817112 0.8727791398733032 0.4982931992487645  
0.3724398821552918 0.4604615221951498 0.4982605429905420  
0.3729063237059763 0.9596403741844159 0.4982364049108053  
0.8727923210358065 0.4603782943109290 0.4982350188345615  
0.8723614297626137 0.9611176031452248 0.4982883018816017  
0.1194464850200203 0.2068443298278322 0.4981754787200636  
0.1191536259181944 0.7073577195435317 0.4982167249410382  
0.6191741035659809 0.2076805635177646 0.4982327600599694  
0.6202718608472942 0.7066844667288233 0.4982703980767662  
0.1193756287612981 0.2928159685875575 0.4981794690196567  
0.1193881632817721 0.7930340088224569 0.4982579750315657  
0.6192245767921958 0.2935827448851344 0.4982250065724889  
0.6194774214119234 0.7928279676034719 0.4982187273692303  
0.2075483065359414 0.2927403821850835 0.4981623368909029  
0.2075993632643422 0.7927444536487697 0.4982292789043075  
0.7065673569898890 0.2941261440866258 0.4982148423862308  
0.7074624869094358 0.7931006648290481 0.4981804023231697  
0.2935963759557032 0.2068391121221429 0.4981632942095282  
0.2933785976057313 0.7067977847761566 0.4981855699677277  
0.7924760413087996 0.2081405794306696 0.4982512640579806  
0.7932373338535141 0.7072851082113280 0.4981812347267789  
0.2936545537389740 0.1185016627690586 0.4981748087350543  
0.2931123641825837 0.6191402837993994 0.4981831319799665  
0.7927531770873310 0.1199685231617496 0.4982782039115024  
0.7933740693110312 0.6192505979979093 0.4982071840335880  
0.2074839321909972 0.1188218499846458 0.4981636314833937

0.2072683418548443 0.6191358677679984 0.4982005072381583  
0.7072322151356998 0.1194950500806884 0.4982481637864420  
0.7074676729625963 0.6198083578915295 0.4982548262904298  
0.2865788283920531 0.4604793205229123 0.4982299440179660  
0.2869173610522349 0.9600994267568757 0.4982104147043986  
0.7874281347974253 0.4598282394675833 0.4982521136933618  
0.7865168155408057 0.9607825814017890 0.4982246992630222  
0.4605248059905180 0.2868493670086284 0.4982119947557150  
0.4608749405292892 0.7854957715217549 0.4982726490619237  
0.9607308190204236 0.2865235047043701 0.4982293273893034  
0.9604826345916616 0.7868820957857007 0.4982177555423840  
0.0401642652100450 0.3743336764382100 0.4982041434474395  
0.0400715356421563 0.8746173573533604 0.4983058981704654  
0.5396491796359509 0.3752411176523087 0.4982445367535613  
0.5401126593131534 0.8739732504722172 0.4981932037195038  
0.0398520304253830 0.2049868258283141 0.4981849196114979  
0.0398291681316265 0.7053800734399293 0.4981746961744690  
0.5399936320639183 0.2055222853350243 0.4981933127151402  
0.5407581210296282 0.7034042962896375 0.4982661139113523  
0.2055273812981323 0.0392809210444414 0.4981406465688923  
0.2052341560951035 0.5398146607806577 0.4981806873114696  
0.7050196103583295 0.0403241629052671 0.4981872081648829  
0.7049704652698104 0.5398341082260373 0.4982510958704882  
0.3749954978472967 0.0391789247846759 0.4981856307286229  
0.3746809221403092 0.5397967696287681 0.4982035827053210  
0.8743846028463029 0.0404297790863597 0.4982806354476145  
0.8749557795616993 0.5398068465363434 0.4981839154247873

0.3748774386243975 0.2049825435505390 0.4981818287008363  
0.3751401609972068 0.7043336931801512 0.4982217093101832  
0.8742847649134327 0.2056388021109754 0.4982616794008024  
0.8747245749809843 0.7052683092883870 0.4981830532915331  
0.2053700403722566 0.3742492157730409 0.4981864261608492  
0.2057073070018650 0.8740887668966477 0.4982510963062581  
0.7043290399092503 0.3762138547010753 0.4982147251979920  
0.7050223867931246 0.8746484836652478 0.4981755960388286  
0.5799144822163446 0.5404331952307035 0.4983232036651711

C2N-O2

1.0000000000000000  
16.6399993895999998 0.0000000000000000 0.0000000000000000  
8.3199996947999999 14.4106621904000001 0.0000000000000000  
0.0000000000000000 0.0000000000000000 15.0000000000000000

C N O

48 24 2

Direct

0.2868441996055834 0.3726863953378332 0.4868531135585501  
0.2869552224712801 0.8726007600559412 0.4969721807072354  
0.7868649750876424 0.3726524977412252 0.4966206390584356  
0.7869032621841707 0.8726049089808030 0.4984904254189508  
0.3728213699912303 0.2867287454290695 0.4868121210887248  
0.3727883915405014 0.7867568553312309 0.4967839676194659  
0.8727314418755374 0.2868190176067914 0.4968135169801737  
0.8727668040018699 0.7867553396622861 0.4982957465934851  
0.4609221050836950 0.3726762491357821 0.4871600430281854

0.4609577317553611 0.8726135685201915 0.4983119123448441  
0.9609247211053954 0.3726637678698128 0.4964712749338834  
0.9608990958345573 0.8726135014557853 0.4972478623595968  
0.3727011836542428 0.4608787834829482 0.4870662817991114  
0.3728162057547162 0.9608029839916068 0.4969611854409102  
0.8727507202040805 0.4608271994283477 0.4979126980683269  
0.8727215558418664 0.9607965342582450 0.4973674039726156  
0.1194600115900894 0.2075262762328586 0.4952153796457954  
0.1194354388361982 0.7075419672873218 0.4935408527088557  
0.6194236971797319 0.2074714734870386 0.4912040675620905  
0.6194604372324535 0.7075246275335244 0.4992569651646605  
0.1194845737885734 0.2933521206356276 0.4934551355462247  
0.1194517285227244 0.7933558765606403 0.4952922208624186  
0.6194068446883552 0.2933874533465657 0.4910795053308709  
0.6194742999630390 0.7933385304912258 0.4994158335405333  
0.2076301125265247 0.2934065948298510 0.4907166185708063  
0.2076209953224206 0.7933786839093266 0.4952293055109694  
0.7075749588801834 0.2933817504687916 0.4937407558810061  
0.7076336355791050 0.7933520054134798 0.4994522922704535  
0.2935594658307542 0.2074821856854746 0.4909615677896269  
0.2934739337772119 0.7075435327735521 0.4935696452375800  
0.7934381179750415 0.2075392636892436 0.4954035953651527  
0.7934704256391570 0.7075324113545460 0.4992960734963036  
0.2934907886513041 0.1193562352382561 0.4938193823083700  
0.2934367242553553 0.6193921904499212 0.4906710431576117  
0.7933902849758389 0.1193523365553296 0.4956238074671919  
0.7934500454679148 0.6193611597485961 0.4991816834381962

0.2076628920434425 0.1193422560269903 0.4953709384846173  
0.2075911568761602 0.6193984658050846 0.4905653944110398  
0.7075730089368788 0.1193367960888746 0.4941032051390166  
0.7076320744406628 0.6193483005630218 0.4991668555894141  
0.2868744150551891 0.4608802966989474 0.4869072830610274  
0.2869858002453021 0.9607880030884393 0.4970275436829161  
0.7869212707782617 0.4608120971406124 0.4979530528840337  
0.7868855690045761 0.9607973659711031 0.4972511908090631  
0.4609079669352402 0.2867432097881106 0.4869208065098356  
0.4609402258634999 0.7867893381351276 0.4981854203430747  
0.9609010701680412 0.2868381241758889 0.4967583340707640  
0.9609241919800350 0.7867771723365818 0.4969009525968782  
0.0402029500491588 0.3747126511073846 0.4945059515489192  
0.0401791544057971 0.8746762313847637 0.4968519095133138  
0.5402019175936292 0.3746964134540523 0.4886124857292825  
0.5402264911345039 0.8746890294988295 0.4990289841137975  
0.0401861996550029 0.2054793887545255 0.4965395280720560  
0.0401799877264373 0.7054436913012319 0.4947681388188934  
0.5402046381484735 0.2054168362580838 0.4886788535370369  
0.5401947215747406 0.7054419504691817 0.4987700827115807  
0.2056075172602154 0.0400758491263510 0.4966643237656720  
0.2055155858872228 0.5401278406580702 0.4883346668812532  
0.7055151045711834 0.0400611980883267 0.4953746637150348  
0.7055532672773022 0.5400818797693469 0.4986642794610581  
0.3748644963239674 0.0400787346762302 0.4950853872952112  
0.3748047580264015 0.5401202281873559 0.4886420569906484  
0.8747539878703178 0.0400960609635015 0.4969863830235738

0.8748261333044800 0.5400953097594002 0.4986379610394075  
0.3748677612727656 0.2053836722752237 0.4884721073211339  
0.3748590780493002 0.7054013484367516 0.4947841435150691  
0.8747966538999168 0.2054439745858426 0.4966082274599598  
0.8748578867375236 0.7053887558698257 0.4988201299097491  
0.2055236906691412 0.3747253884259237 0.4881907648944011  
0.2055794644336837 0.8747118956771502 0.4965853115383727  
0.7055096389503371 0.3747572819048292 0.4947985837365009  
0.7055395050893301 0.8747149062213284 0.4991558454604868  
0.3413498160761229 0.3611691450733591 0.6841991833874389  
0.4143238000120225 0.3645402862752821 0.6846229751512064

C2N-LiO2

1.0000000000000000  
16.6399993895999998 0.0000000000000000 0.0000000000000000  
8.3199996947999999 14.4106621904000001 0.0000000000000000  
0.0000000000000000 0.0000000000000000 15.0000000000000000

C N Li O

48 24 1 2

Direct

0.2869808513337314 0.3717906701691650 0.4981779498176769  
0.2874090969710226 0.8715446004624243 0.4971242042097654  
0.7868249066778639 0.3725030382254851 0.4935327973904776  
0.7871413155444066 0.8720560773350765 0.4986020849046484  
0.3727774106955286 0.2860052516220628 0.4980965295329761  
0.3734080508227686 0.7857317511235622 0.4955700215291733  
0.8725334351424069 0.2863950224337417 0.4956109899068067

0.8729463097047888 0.7861720905387168 0.4989609635628062  
0.4608130366135282 0.3719505264058282 0.4932316399920261  
0.4611809810470724 0.8713515182677100 0.4966388595777577  
0.9604261019046191 0.3721084871195317 0.4972843210137222  
0.9613091695373479 0.8720820794658376 0.4995499712060045  
0.3729095371105477 0.4598557678216317 0.4933484794993903  
0.3730910816982347 0.9594761556571760 0.4977219328190533  
0.8722928975199811 0.4602678609198874 0.4962907449380060  
0.8730134590764709 0.9604229584064690 0.4992386121702234  
0.1193831277268060 0.2066490746381958 0.4986736217193105  
0.1197715869662364 0.7067324887315304 0.4984402391599996  
0.6194976234255439 0.2069687070564425 0.4962941870554595  
0.6205989873132157 0.7066397237315267 0.4934467400521320  
0.1191855595590561 0.2926730104465901 0.4991260698230663  
0.1199868007941852 0.7923850426113804 0.4984845500288473  
0.0399270268508381 0.2047653934786806 0.4976211253315562  
0.0404148205802370 0.7048098730269036 0.4990661644673591  
0.5402514822696435 0.2048630907716881 0.4975665668403058  
0.5410968645850648 0.7036527593394224 0.4937883085661939  
0.2057144099460727 0.0389653389432048 0.4983242255597065  
0.2057904295926402 0.5392832034119742 0.4980512950574300  
0.7057251783034695 0.0395079983414857 0.4982931099106882  
0.7044985814195321 0.5400298986563199 0.4912263750754767  
0.3749893943772659 0.0390125717023836 0.4984952215161982  
0.3751657897377597 0.5391039839223799 0.4914287194328700  
0.8748630127367474 0.0397921778831946 0.4984500482909466  
0.8749424451815164 0.5394531135600454 0.4968634309766150



0.3748423798289411 0.2046293702762055 0.4989363252916243  
0.3756305585051635 0.7041228799500151 0.4941511253597035  
0.8744510775004103 0.2052825664075105 0.4967164449573050  
0.8750672294269559 0.7047404954017208 0.4981101406572183  
0.2055838868791686 0.3738776839462378 0.4990490653658257  
0.2062120509607638 0.8734394308863499 0.4980674214536818  
0.7050425781181809 0.3748117897495593 0.4925200416234449  
0.7056779815317357 0.8741619696806165 0.4973784432702960  
0.5676972659477939 0.5601369924966834 0.5171394166645478  
0.5384401167995410 0.5321580488926552 0.6398373576716256  
0.6018811914981091 0.5558425341147949 0.6485163060846806

C2N-Li2O2

1.0000000000000000  
16.6399993895999998 0.0000000000000000 0.0000000000000000  
8.3199996947999999 14.4106621904000001 0.0000000000000000  
0.0000000000000000 0.0000000000000000 15.0000000000000000

C N O Li

48 24 2 2

Direct

0.2888531609018200 0.3697807026222234 0.4973272663310441  
0.2915636652011587 0.8690558353496974 0.5136212673316138  
0.7880301055803793 0.3726984315680063 0.5087362918530722  
0.7909711585777158 0.8714962921537875 0.5046386360278579  
0.3748324472756557 0.2838274834064338 0.4980409262615495  
0.3777847631697908 0.7832630522309535 0.5158208005597509  
0.8739306747137116 0.2865785803880646 0.5073369792065561

0.8767862425192687 0.7857057421484969 0.5040009190405721  
0.4618411164576199 0.3693804244704000 0.4946666788274260  
0.4643733531438840 0.8705351237203973 0.5135656269265817  
0.9629314643327936 0.3710267819753073 0.5057092756720170  
0.9650757396971354 0.8715482798043527 0.5046144350618086  
0.3746919662357887 0.4566056385242306 0.4950183629983933  
0.3759491428112440 0.9581293344875523 0.5112881923066461  
0.8753740810105753 0.4593366172038080 0.5079850784778708  
0.8768022362663856 0.9597830993620367 0.5042033175351761  
0.1213251426574463 0.2047255573685555 0.5065818450869638  
0.1233800409701759 0.7053051886948409 0.5023881131976141  
0.6220752343238817 0.2056500453087226 0.4992500137613375  
0.6249354984865333 0.7070047478081601 0.5187788005062739  
0.1215334301306520 0.2906488080041517 0.5036767344235509  
0.1238783661587496 0.7907720260834062 0.5056701565097966  
0.6218226564679973 0.2915465304030860 0.4981271125860792  
0.6234689207613369 0.7929233359382153 0.5121924577253820  
0.2096445403825297 0.2905658477124257 0.5015275827542406  
0.2123454437134717 0.7897253844919749 0.5083056853963472  
0.7088032497214031 0.2927659052995470 0.5019642401612309  
0.7116304187547128 0.7924770377788896 0.5083183130534846  
0.2954755805626487 0.2047536191524554 0.5028257868397306  
0.2981780692108270 0.7036656859780388 0.5070098028417312  
0.7949059575574633 0.2071257218375930 0.5039076283630204  
0.7976142850907487 0.7065158222552578 0.5072874169610002  
0.2955477272057285 0.1166916321955817 0.5065208965687227  
0.2970872101852204 0.6165094317746025 0.5008667916339629

0.7959846415014974 0.1185209893056337 0.5033550376784156  
0.7979568546257328 0.6183177231741055 0.5097785275689787  
0.2096286346884158 0.1164671010776354 0.5082327717524767  
0.2109267732899788 0.6169772698080559 0.5000645859043001  
0.7104852779978725 0.1180980655395484 0.5015873354779556  
0.7120907316783146 0.6197493551381625 0.5168886499846140  
0.2885463723242583 0.4579831712916033 0.4962870533575003  
0.2904545912878770 0.9576882950586177 0.5124859865030772  
0.7893513329910146 0.4597812281342027 0.5129069516854632  
0.7909192604181079 0.9595725743487352 0.5035489538605779  
0.4631109616595783 0.2834215212148511 0.4967243735183163  
0.4648058137456241 0.7845785365156240 0.5192348789814990  
0.9625097050624145 0.2855045465844857 0.5070977725587137  
0.9647989953328373 0.7856378039254225 0.5031880219245084  
0.0426873385476995 0.3723235737792726 0.5034331640309356  
0.0449081076752588 0.8727066642385531 0.5063265053508383  
0.5413010462089529 0.3725712992830592 0.4947951520575050  
0.5434098970209520 0.8736382455086096 0.5113208656166854  
0.0414375083277454 0.2036121403830441 0.5077595921363975  
0.0436672719494821 0.7039538451665435 0.5015866441968412  
0.5430431813534188 0.2025367058220534 0.4982600838934425  
0.5455999849141064 0.7039593627841522 0.5255266782842819  
0.2085288840763364 0.0365808094291286 0.5111116656063623  
0.2078875933977616 0.5379528754165549 0.4979283761950320  
0.7091940699230308 0.0383510818044419 0.5019993298156805  
0.7088316238887467 0.5403000027737916 0.5205178586757900  
0.3772549117422655 0.0378454326342033 0.5081721747895500

0.3778561000942054 0.5359695789974954 0.4971699432677790  
0.8778944759711864 0.0397120374072997 0.5043887393499582  
0.8785379215264395 0.5383864901043575 0.5069835621953882  
0.3769175406120014 0.2025228529718022 0.5008476981042095  
0.3800456366113181 0.7013087743846865 0.5113159170482809  
0.8759965377594335 0.2053067134061431 0.5054810582271781  
0.8789574762803711 0.7042453872339616 0.5049119331638225  
0.2074811618140141 0.3719564527510809 0.4988430477481322  
0.2104459239378914 0.8709715600732753 0.5107962370652867  
0.7062552832476187 0.3748436807825263 0.5044065792358068  
0.7095241027092658 0.8738291288824500 0.5066250552769045  
0.5965915266838250 0.5134939236229611 0.6909803241844827  
0.5311350558003386 0.5181558357290099 0.6342858868704589  
0.5895590739667493 0.5801166686637212 0.5887203015541996  
0.5121293431195800 0.5032322673478887 0.5144022895139463

C2N-Li3O2

1.0000000000000000  
16.6399993895999998 0.0000000000000000 0.0000000000000000  
8.3199996947999999 14.4106621904000001 0.0000000000000000  
0.0000000000000000 0.0000000000000000 15.0000000000000000

C N O Li

48 24 2 3

Direct

0.2889311494884617 0.3712045056092005 0.4966696354944383  
0.2893444325248026 0.8709380101215209 0.5005672358462327  
0.7889422136911176 0.3714752719856770 0.5250473972107433

0.7892172373699180 0.8711682726372905 0.4976194105380221  
0.3747391547022006 0.2854364148715542 0.4967102133209189  
0.3754613371144860 0.7852706181427468 0.5039971794716458  
0.8744686810860474 0.2858044022301767 0.5158928440280779  
0.8751990342061906 0.7852937568704301 0.4984220640044298  
0.4622912634317063 0.3713904828660873 0.5036043561305374  
0.4630920727330249 0.8710814519978991 0.5041348558544950  
0.9627252318937931 0.3712772295653654 0.5135910316012525  
0.9630134450403169 0.8713198233014262 0.4943414085252184  
0.3751429126019397 0.4586768778257345 0.4987226490917523  
0.3749693650614811 0.9591481832658193 0.5012981385838677  
0.8746248990094662 0.4592441684851547 0.5183400121429660  
0.8751798219769756 0.9592259707553457 0.4961588167225887  
0.1212296082165588 0.2060632925967313 0.5053187671906613  
0.1214150319200661 0.7061037373888220 0.4924818017384033  
0.6220471372031667 0.2052513158116197 0.5009944421672087  
0.6228958966351641 0.7067726682064125 0.5168463929202255  
0.1212358382108552 0.2921013560128198 0.5049314308037973  
0.1214968665331449 0.7920057445175205 0.4931912301535771  
0.6226328370630307 0.2901752929249923 0.5101338816390301  
0.6222228777058146 0.7922371561035566 0.5071654729122131  
0.2093239258729225 0.2921095699767824 0.5003760327035709  
0.2092482350532264 0.7921534527931411 0.4950430741100494  
0.7102614981345536 0.2899881919380033 0.5162578594505931  
0.7101043056253827 0.7919450785244592 0.5041008870147530  
0.2953256328231806 0.2061221390080299 0.4986958386864078  
0.2943059450287555 0.7063322969111059 0.4961330921682738

0.7960377992423909 0.2053411705829229 0.5089966555428264  
0.7961165075942642 0.7061046593037321 0.5069729199133964  
0.2953969549552434 0.1179095980405815 0.4999520197900075  
0.2941607473991767 0.6188623598189892 0.4944850091716520  
0.7959274752899338 0.1176514040184684 0.5017242101519929  
0.7962688767846742 0.6182653061778762 0.5144296567800735  
0.2094437839474550 0.1178569146744405 0.5022386059612599  
0.2090675354171311 0.6182117471060556 0.4924866479696842  
0.7099890199895552 0.1177123197331456 0.4989965708515581  
0.7105681028212607 0.6193160020107031 0.5220408682576512  
0.2890174331468055 0.4592536194143678 0.4953762001760257  
0.2892458888783350 0.9590895906101276 0.5014263158497753  
0.7890855880850492 0.4590246363397744 0.5267723498267792  
0.7892293994783138 0.9592362174482170 0.4961258055963924  
0.4628608895543382 0.2853865229510695 0.4983403863746155  
0.4625802271416882 0.7855817597015397 0.5099288027872654  
0.9626405915189198 0.2855750807989204 0.5128633445767965  
0.9629834299665353 0.7853768643827329 0.4949365073107658  
0.0419324525998089 0.3734795762492241 0.5091811214431259  
0.0423096984574120 0.8734587096411994 0.4935383145884377  
0.5425678391450430 0.3724137668999875 0.5131289009343677  
0.5423590007905434 0.8733041208131722 0.5029487519006953  
0.0418516979660792 0.2041056154460402 0.5088504541606166  
0.0422059406030499 0.7038914478381406 0.4934472893703659  
0.5422435070542537 0.2039050142815478 0.4971923386833499  
0.5429222233231215 0.7044615628694173 0.5200954722405466  
0.2076986607579909 0.0383248824004389 0.5022166104100807

0.2076171414659721 0.5383609252253596 0.4920170212073071  
0.7078642444628845 0.0383786297906213 0.4964738234777540  
0.7078344092249574 0.5399003686934886 0.5318851856240282  
0.3768859713809636 0.0385966996196066 0.4997828597633743  
0.3762878793883478 0.5391568323034304 0.4968257418128172  
0.8773075568349930 0.0385576103032266 0.4992254578091904  
0.8772349989880350 0.5383203822784481 0.5141854337369457  
0.3767543853091533 0.2040095295041414 0.4969384804880463  
0.3765437608899898 0.7036641277381337 0.5002866378971528  
0.8770391390199319 0.2042154086996731 0.5099604922554344  
0.8774551437869518 0.7038393736979001 0.5033277798809983  
0.2074314847790709 0.3734701845293478 0.4985681926117011  
0.2078867464095617 0.8733830963234988 0.4963853664120876  
0.7075527153249240 0.3719552550609007 0.5279451555054546  
0.7078557149455003 0.8733897151108447 0.4996768893498996  
0.5960938396620868 0.5081184006985164 0.6920603456745898  
0.5141227727498238 0.5502468004810298 0.6347566311079750  
0.5921249897957236 0.5946306688518982 0.6145339304066305  
0.5924002760718092 0.4281928649268546 0.6117358744125097  
0.4778169766431833 0.5695773783648388 0.5178794777200485

C2N-Li4O2

1.0000000000000000

16.6399993895999998 0.0000000000000000 0.0000000000000000

8.3199996947999999 14.4106621904000001 0.0000000000000000

0.0000000000000000 0.0000000000000000 15.0000000000000000

C N O Li

48 24 2 4

Direct

0.2886021751221250 0.3705512659845878 0.5003459864727168  
0.2887057993973008 0.8703241635659205 0.4979575376686294  
0.7891298758573717 0.3705782325408373 0.5247351233741386  
0.7882794760572821 0.8708057143321583 0.4968524193717059  
0.3744945057138097 0.2848890973862326 0.5001632272560295  
0.3747685193056161 0.7847389282656531 0.5019815456983656  
0.8743918402384890 0.2849229113990104 0.5147387240803843  
0.8743132222528064 0.7848919960865202 0.4967492617235137  
0.4616983700748623 0.3711679713452253 0.5094143263489807  
0.4624705564384473 0.8700842992872072 0.5022202231466156  
0.9624570200063639 0.3705154283089176 0.5113367171295407  
0.9620837058152591 0.8708666150829221 0.4932163471696062  
0.3746337883999500 0.4581365708796983 0.5036214381856335  
0.3745596847934171 0.9581572108688076 0.4990198421909444  
0.8745240767391844 0.4583880450225066 0.5156204240082672  
0.8743049623882846 0.9586981236242538 0.4955089183044589  
0.1210586026498516 0.2051959876180873 0.5030349331572254  
0.1205490736452149 0.7055528338571907 0.4931319507584783  
0.6215076538044427 0.2049118040126680 0.5051808703412419  
0.6224770691914862 0.7056989338620613 0.5140669181151019  
0.1211037383231504 0.2912186472257288 0.5034830137349540  
0.1206064533102936 0.7915283829786783 0.4923586162357031  
0.6224056716042317 0.2895793044181586 0.5145310401000863  
0.6216147876950576 0.7912814585579360 0.5053406264541433  
0.2091766209627252 0.2911822728958741 0.5005848351307532



0.2082794975511561 0.7916936838369161 0.4935805364430390  
0.7099213010576314 0.2891334884694170 0.5184422997187087  
0.7093808271267614 0.7912183678669791 0.5024234515158368  
0.2952967758192315 0.2052121639113812 0.4986860524079689  
0.2931288600132207 0.7058643215878417 0.4956287302630033  
0.7956246775392685 0.2045558113739189 0.5096217972476877  
0.7954447892675902 0.7054048103361980 0.5042517062679510  
0.2952749141362510 0.1170382147704049 0.4983330435778680  
0.2930773192684417 0.6186098781630052 0.4962572841481960  
0.7952991009937537 0.1171007072300353 0.5025488009876015  
0.7957713435509962 0.6175954850493046 0.5109905832554711  
0.2091557553944066 0.1171494568810675 0.4997811034108761  
0.2081980244861528 0.6176688251610650 0.4949069974768217  
0.7092896218550312 0.1172650720361458 0.5014705490059861  
0.7100201468280577 0.6186433950863442 0.5185247028666826  
0.2885633564659948 0.4585992252820932 0.4999495444194894  
0.2887176265342121 0.9583323085890366 0.4986601666357673  
0.7891853219326496 0.4579792019983753 0.5248153618107092  
0.7883007181646215 0.9587461456262426 0.4963596576281209  
0.4623638216861214 0.2851416684895472 0.5032172981513241  
0.4617863182189954 0.7847104987443517 0.5079302866798279  
0.9623854013935299 0.2847516651080694 0.5108228891732119  
0.9620352025460622 0.7849585275586464 0.4939610836283521  
0.0417524390271510 0.3726530343945341 0.5074136342135377  
0.0414280049709834 0.8730222638429912 0.4921419495484010  
0.5422531274107236 0.3723382157376945 0.5190962313204107  
0.5417688663918677 0.8724754699751348 0.5015548843387719

0.0416202726044102 0.2032455359842195 0.5064762552351999  
0.0413291285965684 0.7033725262717411 0.4936622936604915  
0.5417077875840324 0.2034777947360447 0.5016598754667575  
0.5423425141032368 0.7030270344950096 0.5177459221029178  
0.2072338057818595 0.0376421894772093 0.4992308153674360  
0.2069209784110883 0.5376617746415073 0.4959971170128789  
0.7069048318309845 0.0381084723848947 0.4983563265409693  
0.7076964118667349 0.5389357534463450 0.5287889695651982  
0.3766913664261818 0.0375634488272460 0.4980457184545583  
0.3756466967155151 0.5389072107582773 0.5002448275209123  
0.8766240529237528 0.0379442173081881 0.4985976071310101  
0.8768422954391650 0.5376819879691835 0.5107499283142864  
0.3767149239226895 0.2033009500998875 0.4985832114330367  
0.3757412848764577 0.7029421891566103 0.4992095860608573  
0.8767024411344069 0.2033591516880725 0.5090092080634425  
0.8767430228646400 0.7032969654219901 0.5006494021049446  
0.2071533105339782 0.3726712582742420 0.5007256449332018  
0.2070600255958322 0.8729534402082078 0.4938878505738717  
0.7076287424847663 0.3711120168580490 0.5293084048564091  
0.7069128392503675 0.8727957329877549 0.4989120026988660  
0.5900014378454433 0.5151434761749097 0.6975088772282918  
0.5033926430545974 0.5574635320177723 0.6360956399402361  
0.5930005638441325 0.5908998372971501 0.6066356022843382  
0.5933764223773337 0.4340087416716082 0.6085959576479208  
0.4759428352615769 0.5707736627240175 0.5109965248047882  
0.4812611622523376 0.5716517406062791 0.7520484176983314

C2N-DMDMB

1.0000000000000000

16.6399993895999998 0.0000000000000000 0.0000000000000000

8.3199996947999999 14.4106621904000001 0.0000000000000000

0.0000000000000000 0.0000000000000000 15.0000000000000000

C N O H

56 24 2 18

Direct

0.2886940605914087 0.3718519149603403 0.3250084959806441

0.2884736467624510 0.8718728984847900 0.3284152597174176

0.7886398012269953 0.3717053344945849 0.3187394782230591

0.7885063928403389 0.8717709834081051 0.3249233457367026

0.3744691541025839 0.2860317972098960 0.3229321877820757

0.3742881677691192 0.7860597495378758 0.3274575534480390

0.8744690355659026 0.2858677131991916 0.3191419860002184

0.8743505263384248 0.7859243018834308 0.3263657650320527

0.4626049595749555 0.3719341630219157 0.3180457482433294

0.4625288007223470 0.8718130964454802 0.3286625251297605

0.9625756284762100 0.3717551391593140 0.3239491644274120

0.9625046567629678 0.8717771807631333 0.3250948558038187

0.3745306494868770 0.4600960970176878 0.3216812421709282

0.3743740097195833 0.9600273772857736 0.3284880866623192

0.8743389665403468 0.4599121339499262 0.3243070324346715

0.8743460726280747 0.9599324007585694 0.3222889958545552

0.1211665417241639 0.2067314828022979 0.3248954288041764

0.1211270075298245 0.7066723795307220 0.3277461528353961

0.6211259147881654 0.2066964626241383 0.3162784863795596

0.6210453674578096 0.7066625401608110 0.3274573374371221  
0.1211576191970268 0.2925825049608892 0.3256265306921366  
0.1210544122059330 0.7925543390616540 0.3274286813835265  
0.6211565142304223 0.2924562843154346 0.3138918208662685  
0.6210810234754726 0.7924710641849660 0.3281568845440229  
0.2093506317903777 0.2926236844018852 0.3260343994161260  
0.2091991854887216 0.7926118472998255 0.3278619600589785  
0.7093451432921765 0.2923965814916816 0.3141061519483331  
0.7092459567903373 0.7924928191835902 0.3272168070705685  
0.2951762909063738 0.2067790640778782 0.3255572721365849  
0.2950098536712341 0.7067889334014623 0.3264657232916688  
0.7951548759985205 0.2066057328123152 0.3160038651666418  
0.7950501244914459 0.7066602694579522 0.3272210033603002  
0.2951511998033665 0.1185926450177870 0.3267606768629457  
0.2951199596771248 0.6186001646945183 0.3252468560318297  
0.7951335335307040 0.1184349289122492 0.3174530050360935  
0.7950068968016685 0.6184891650614419 0.3266888219379367  
0.2093310144329619 0.1185738032805241 0.3264536882921829  
0.2093622309529085 0.6185276604059623 0.3271683330743777  
0.7092756202456959 0.1184678763582424 0.3175586999711954  
0.7091801948755694 0.6184709361377982 0.3263180013718499  
0.2887951957077269 0.4599939809567315 0.3250242668784308  
0.2885344342723119 0.9600262245944050 0.3283159137130808  
0.7885465522864760 0.4598520744243308 0.3225782768617916  
0.7885116091279435 0.9599411035275789 0.3222524119177733  
0.4625947630165685 0.2860913902023882 0.3196716607970598  
0.4624602692707707 0.7860133779902335 0.3278213877122354

0.9626214683642693 0.2859177652065391 0.3219048788692025  
0.9625363589898190 0.7859415875205428 0.3265561302333427  
0.4613827351721176 0.5135237170080682 0.6245662472249204  
0.5480107398697989 0.5003890533676748 0.5696328483115641  
0.3162475952921808 0.5181938714378310 0.5856959164799227  
0.6907254565893810 0.5008277163760986 0.6059535567986277  
0.4137774139752144 0.6071137160052836 0.6731732482021184  
0.4897380676173926 0.4344072142222883 0.6918689401141038  
0.5990301564654318 0.4037859886267947 0.5269395785625134  
0.5197096731953639 0.5748473357844019 0.4976759502035974  
0.0418172972036549 0.3739019365102180 0.3254670702383461  
0.0417656469863889 0.8738889901612000 0.3259413344750307  
0.5418713002103797 0.3738701109245647 0.3141680955274009  
0.5418263138129893 0.8738438185746368 0.3288092805293027  
0.0419328157131786 0.2045979609758539 0.3226904759553729  
0.0418348298719222 0.7045958373378679 0.3277161377418186  
0.5418183908579537 0.2047144961277901 0.3184913245132562  
0.5417354886374871 0.7046416138450893 0.3271874646304829  
0.2072128216702226 0.0393204591949274 0.3273844517812972  
0.2074075993143664 0.5391957008783276 0.3274552499882135  
0.7071772892369256 0.0392099057853718 0.3198637505306825  
0.7071674136737034 0.5391370775256310 0.3244166769065322  
0.3764842998923492 0.0392833192176754 0.3278377400098399  
0.3764758977410947 0.5394220976588741 0.3221477568921500  
0.8764579135140558 0.0391681488093696 0.3197781364629194  
0.8763495990488742 0.5392014769144990 0.3262666349127713  
0.3765448790799708 0.2046765531284203 0.3236808469955368

0.3763468222765792 0.7047316069915250 0.3260876378043079  
0.8765159242221986 0.2045370169974333 0.3178634052756318  
0.8764339381398479 0.7045649574883746 0.3272080997727030  
0.2073079800660676 0.3739733701795900 0.3263161973428013  
0.2070979278236765 0.8739792015356070 0.3286703784945940  
0.7073424230630789 0.3737536062062139 0.3155365243994484  
0.7071512858100465 0.8738617202425136 0.3258135568815667  
0.4008008362124533 0.5105764091424022 0.5562836342515295  
0.6065190359560713 0.5087302709903710 0.6368879384592765  
0.2794915696107517 0.5167879465180373 0.5253105031087060  
0.3270525543135055 0.4598311390008160 0.6290070983822630  
0.2714184668910927 0.5840118401132317 0.6211954196940978  
0.7273831637956569 0.5042729453243594 0.6654477980480685  
0.7354997256190098 0.4341372829937957 0.5717741539784595  
0.6791541010753380 0.5579110866657329 0.5604772411985562  
0.4645963586690645 0.6134436724889352 0.7147710773549428  
0.3835484318332498 0.6651827090445022 0.6257694543116654  
0.3581578664870385 0.6128863048267371 0.7169941109599210  
0.4323474815891127 0.4486647774713353 0.7373900004570407  
0.5108334134265978 0.3683233321359553 0.6578992719050153  
0.5481719586352760 0.4268982583767130 0.7321912568140166  
0.6488315772971214 0.4001235639897671 0.4768960369818916  
0.6361234867609874 0.3495656617816180 0.5772312296762209  
0.5488497924457462 0.3902905494633386 0.4924895366508176  
0.4903708639752305 0.6444087694375681 0.5271684407090313  
0.5788630606107095 0.5620503490251912 0.4554325506613148  
0.4684751052496317 0.5737618835307708 0.4525454088381125

C2N-DMSO

1.0000000000000000

16.6399993895999998 0.0000000000000000 0.0000000000000000

8.3199996947999999 14.4106621904000001 0.0000000000000000

0.0000000000000000 0.0000000000000000 15.0000000000000000

C N S O H

50 24 1 1 6

Direct

0.2860789603538390 0.3710870158959271 0.4928689195874738

0.2863270115073566 0.8709646328463050 0.4929365462690109

0.7862335365439674 0.3712700425404648 0.4935306524175801

0.7858968535822688 0.8716265226550136 0.4948317332070913

0.3720215089114507 0.2853215967170095 0.4948355421284507

0.3721419802611070 0.7850715799689956 0.4937642450833550

0.8719313878789560 0.2854776939311983 0.4957128849212041

0.8717525241210785 0.7857993264715600 0.4931910056162549

0.4600059634317750 0.3713276030646552 0.4939091028862911

0.4602463046810032 0.8709649934180681 0.4930157305066955

0.9603518248144576 0.3710733144462242 0.4926621998063856

0.9599371759408560 0.8716391661690911 0.4948171076681144

0.3717898395983329 0.4592423660442832 0.4914520089347913

0.3720867042312021 0.9591760621627698 0.4928674771844365

0.8722777500050340 0.4593328042896079 0.4916728753584592

0.8717218348410849 0.9598308058329673 0.4968950103132990

0.1187494702593269 0.2058920818113743 0.4935413252658531

0.1184413499952516 0.7062875556814208 0.4917764890361439

0.6185022917019830 0.2067041789526960 0.4990917250798573  
0.6189646377060308 0.7059744361335376 0.4921662648423896  
0.1188596746866303 0.2916480107863867 0.4926833195310298  
0.1185165833619450 0.7920671965096411 0.4926020021520803  
0.6184366581506463 0.2925356616792386 0.4974290601068570  
0.6188447446184080 0.7918678565787531 0.4923190426887467  
0.2069928548412024 0.2916750891902291 0.4927393144163560  
0.2067634045057059 0.7919485695235762 0.4921930120998875  
0.7065309732213857 0.2925219159889405 0.4972636357945672  
0.7069415263767296 0.7920388581643574 0.4926785916519806  
0.2928629357625383 0.2059207469734685 0.4936536685124207  
0.2925305490691249 0.7060257074231491 0.4920392859963061  
0.7923248144902408 0.2066648818833750 0.4987422020053279  
0.7927884793093855 0.7062658588468509 0.4917951592905228  
0.2928342038800646 0.1177386823248479 0.4931728906465363  
0.2922760338805943 0.6180437290302342 0.4908441689300635  
0.7924363562456662 0.1184040561463092 0.4992993327744020  
0.7929430205520148 0.6180180946184463 0.4912260388569890  
0.2069636537875377 0.1177218706300959 0.4931299254641392  
0.2065293081736664 0.6180240582685288 0.4911312992307960  
0.7066255737104723 0.1184240490168226 0.4994384439115673  
0.7071793938426050 0.6179894604513739 0.4909889786914358  
0.2859117537446096 0.4593494110607154 0.4917592221966599  
0.2863226423851490 0.9591542930407566 0.4928191949936379  
0.7865140074877710 0.4592204601845425 0.4913029237732975  
0.7859084826084524 0.9598283642179665 0.4969510730997916  
0.4600996901429271 0.2855161772348879 0.4962401475394503



0.4603071817619565 0.7850834306142966 0.4937778674733849  
0.9601664835951471 0.2853325517870431 0.4944855538242178  
0.9598997094906171 0.7858112761499323 0.4932268654660086  
0.4591664988340515 0.5271357049711606 0.6888127799892022  
0.6223166483341129 0.5218942376154624 0.6803491736918262  
0.0396518965959823 0.3730599135132917 0.4920334435425058  
0.0393268519734741 0.8735232634335531 0.4942722836214543  
0.5391165266762552 0.3737458916111538 0.4945040735946497  
0.5394807998449016 0.8731102252799624 0.4926935313993412  
0.0394244103274281 0.2039211858929574 0.4947392512418578  
0.0390703720020576 0.7043912993661522 0.4918942234708221  
0.5393898865094126 0.2043084469463858 0.4986082187121202  
0.5397191487716626 0.7037436807798254 0.4935920583059294  
0.2049361749069737 0.0384222647816511 0.4928226306617376  
0.2045418820878941 0.5386563781297929 0.4915292648541266  
0.7045361789896166 0.0391513035281605 0.4983537044476055  
0.7052002680532311 0.5386272793624144 0.4906182910308411  
0.3741716129707973 0.0384535668553710 0.4929193959802991  
0.3736258485385028 0.5386883017434556 0.4907403289333771  
0.8737987933081186 0.0391389313639719 0.4981444324996396  
0.8743134872023540 0.5386528604250616 0.4914407093779279  
0.3741993114804772 0.2038957500021398 0.4949712506052420  
0.3740684126905225 0.7037189820649318 0.4935919091171819  
0.8738255385395944 0.2042727076150264 0.4981268721196239  
0.8740591013594421 0.7043484698018034 0.4918062730990715  
0.2047761782860656 0.3730974060265542 0.4920759053537628  
0.2048942969757354 0.8731885232267993 0.4926071029346100

0.7046703828689180 0.3737237682119719 0.4942946572683037  
0.7046245121550976 0.8735004450719487 0.4943095220864927  
0.5748325089281925 0.4574746887643713 0.7352342936609585  
0.6178162737065771 0.3633486413387751 0.6927286861635713  
0.4278178195983440 0.5975600483061604 0.7167779219596783  
0.4639215099607595 0.5284952396168330 0.6157165928546720  
0.4187852915846929 0.4945354961592255 0.7094389369901527  
0.6130121313177035 0.5209344973324798 0.6078033717580413  
0.5867282471653210 0.5933840953159465 0.7060741678256960  
0.6963211514061682 0.4875438621873309 0.6975939306160907
